# Supplementary material
Source: publisher figshare collection journal article supplement (https://sage.figshare.com/ndownloader/files/14375978)
Supplement: Supplementary file 1 [file 14375978]

**Supplemental Table 2.** Ovarian mRNA Levels of Gonadotropin and Steroid Hormone Receptors

| Groups                      | Genes <sup>a</sup> |              |
|-----------------------------|--------------------|--------------|
|                             | <i>Pgr</i>         | <i>Esr2</i>  |
| Prepubertal CON             | 0.93 ± 0.16        | -0.64 ± 0.20 |
| Prepubertal FGR             | 0.68 ± 0.09        | -1.04 ± 0.16 |
| Young Adult CON             | 0.77 ± 0.09        | -0.43 ± 0.12 |
| Young Adult FGR             | 0.78 ± 0.09        | -0.60 ± 0.16 |
| Main Effects <i>P</i> Value |                    |              |
| Offspring Age               | .75                | .06          |
| Maternal Diet               | .31                | .10          |
| Interaction                 | .27                | .51          |

Abbreviations: CON, control; *Esr2*, estrogen receptor 2; FGR, fetal growth restriction; *Pgr*, progesterone receptor.

<sup>a</sup> Values are expressed as mean ± SEM. *Esr2* data were log transformed to achieve normality. Statistical significance for *Pgr* and *Esr2* was assessed using a two-way ANOVA with maternal diet and offspring age as factors and Tukey's *post hoc* for multiple comparisons. Prepubertal = P25, Young Adult = P110.
